# Supplementary material
Source: publisher figshare collection journal article supplement (https://karger.figshare.com/ndownloader/files/24090098)
Supplement: Supplementary file 1 [file 24090098]

**Supplementary table 2: Univariable analyzes of acute and chronic deterioration of renal function**

|  | **Acute deterioration of renal function** | | | **Chronic deterioration of renal function** | | |
| --- | --- | --- | --- | --- | --- | --- |
|  | **HR** | **95%-CI** | **p**c | **HR** | **95%-CI** | **p**c |
| **Age (>65 vs. ≤65 yrs.)** | 0.98 | 0.67 – 1.44 | 0.924 | 2.04 | 1.55 – 2.70 | < 0.001 |
| **Obesity (BMI ≥30 vs <30)** | 0.99 | 0.63 – 1.56 | 0.975 | 1.09 | 0.79 – 1.49 | 0.585 |
| **Diabetes Mellitus** | 1.35 | 0.83 – 2.18 | 0.221 | 1.67 | 1.17 – 2.33 | 0.005 |
| **Arterial Hypertension** | 2.07 | 1.27 – 3.36 | 0.003 | 1.59 | 1.18 – 2.19 | 0.002 |
| **ECOG (≥ 1 vs. 0)** | 2.36 | 1.30 – 4.30 | 0.004 | 2.08 | 1.19 – 3.37 | 0.012 |
| **Type of Operation (RN vs. PN)** | 1.43 | 0.97 – 2.11 | 0.069 | 2.77 | 2.10 – 3.68 | < 0.001 |
| **T-Stadium (T3 - 4 vs. T1 - 2)** | 0.88 | 0.54 – 1.42 | 0.602 | 2.22 | 1.62 - 3.01 | < 0.001 |
| **Anemia** | 1.30 | 0.83 – 2.04 | 0.258 | 1.51 | 1.03 – 2.16 | 0.036 |
| **PBT** | 2.62 | 1.59 – 4.32 | < 0.001 | 2.93 | 1.74 – 4.63 | < 0.001 |
| **CKD (3 - 5 vs. 1 - 2)** | 1.51 | 1.00 – 2.23 | 0.051 |  |  |  |
| **AKI (2 - 3 vs. 0 - 1)** |  |  |  | 2.33 | 1.64 – 3.26 | < 0.001 |

c = Cox Regression; Abbreviations: PBT = perioperative blood transfusion, CKD = chronic kidney disease, AKI = acute kidney injury
